# Supplementary material for: Valorization of Invasive Plant Extracts against the Bispecies Biofilm Staphylococcus aureus–Candida albicans by a Bioguided Molecular Networking Screening
Source: MDPI journal article supplement (doi:10.3390/antibiotics11111595), 2022-11-11
Supplement: s1 [file s1]

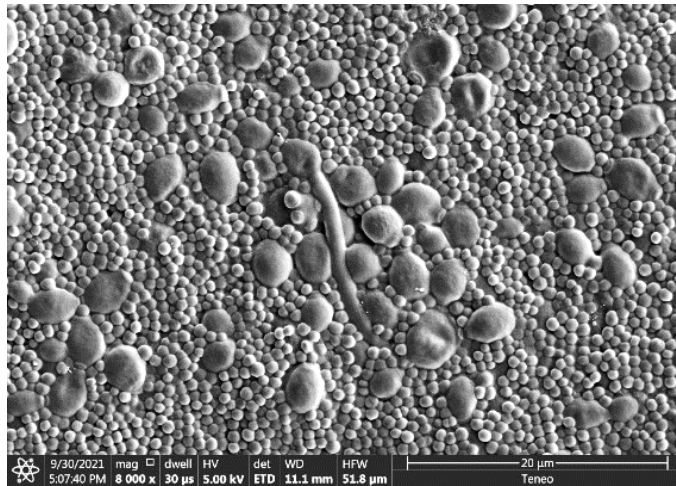

(a)

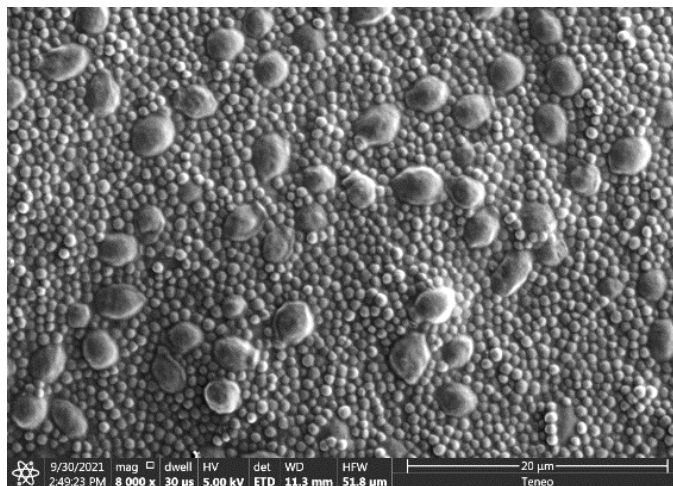

(b)

**Figure S1:** SEM approach of 24 h preformed polymicrobial biofilm *C. albicans*-*S. aureus* treated with DMSO 2% (a) and Lg-AS-MeTHF extract at 100  $\mu\text{g.mL}^{-1}$  (b) for 24 h.

# Supplementary Materials

## Acylglycerols

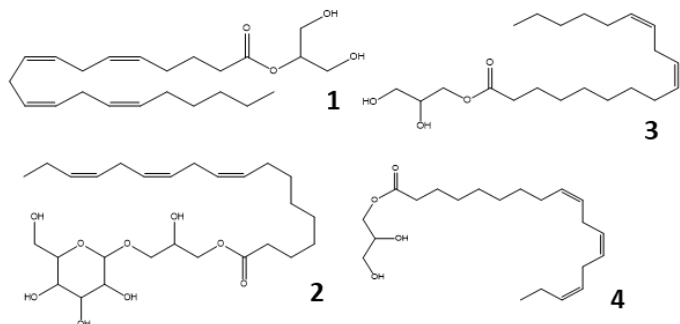

## Fatty acids

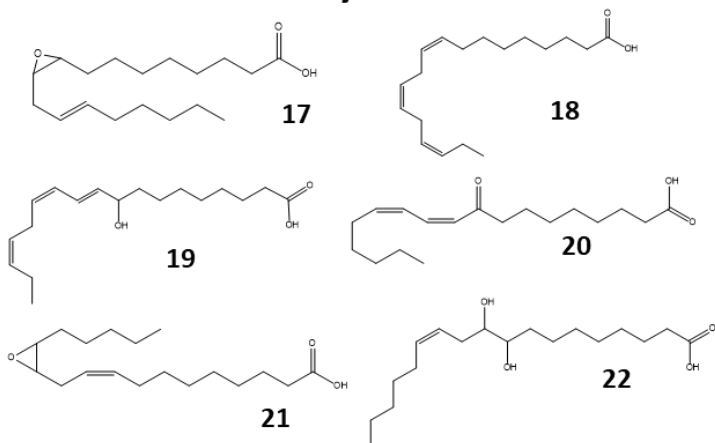

|    |                                                                          |
|----|--------------------------------------------------------------------------|
| 1  | 2-arachidonoylglycerol                                                   |
| 2  | 9,12,15-octadecatrienoic acid,3-(hexopyranosyloxy)-2-hydroxypropyl ester |
| 3  | linoleoylglycerol                                                        |
| 4  | monolinolenin                                                            |
| 5  | betulinic acid                                                           |
| 6  | betulin                                                                  |
| 7  | 3-O-feruloyl-2-hydroxy-12-ursen-28-oic acid                              |
| 8  | 3-O-p-coumaroyl-2-hydroxyurs-12-en-28-oic acid                           |
| 9  | 2-O-p-coumaroylalphitolic acid                                           |
| 10 | asiatic acid                                                             |
| 11 | madecassic acid                                                          |
| 12 | enoxolone                                                                |
| 13 | ursolic acid                                                             |
| 14 | oleanolic acid                                                           |
| 15 | sumaresinolic acid                                                       |
| 16 | dysolenticin B                                                           |
| 17 | 9,10-epoxy-12-octadecenoic acid                                          |
| 18 | linolenic acid                                                           |
| 19 | 9-hydroxy-10,12,15-octadecatrienoic acid                                 |
| 20 | 9-Oxo-10,12-octadecadienoic acid                                         |
| 21 | 12,13-epoxy-9-octadecenoic acid                                          |
| 22 | 9,10-dihydroxy-12-octadecenoic acid                                      |

## Triterpenoids

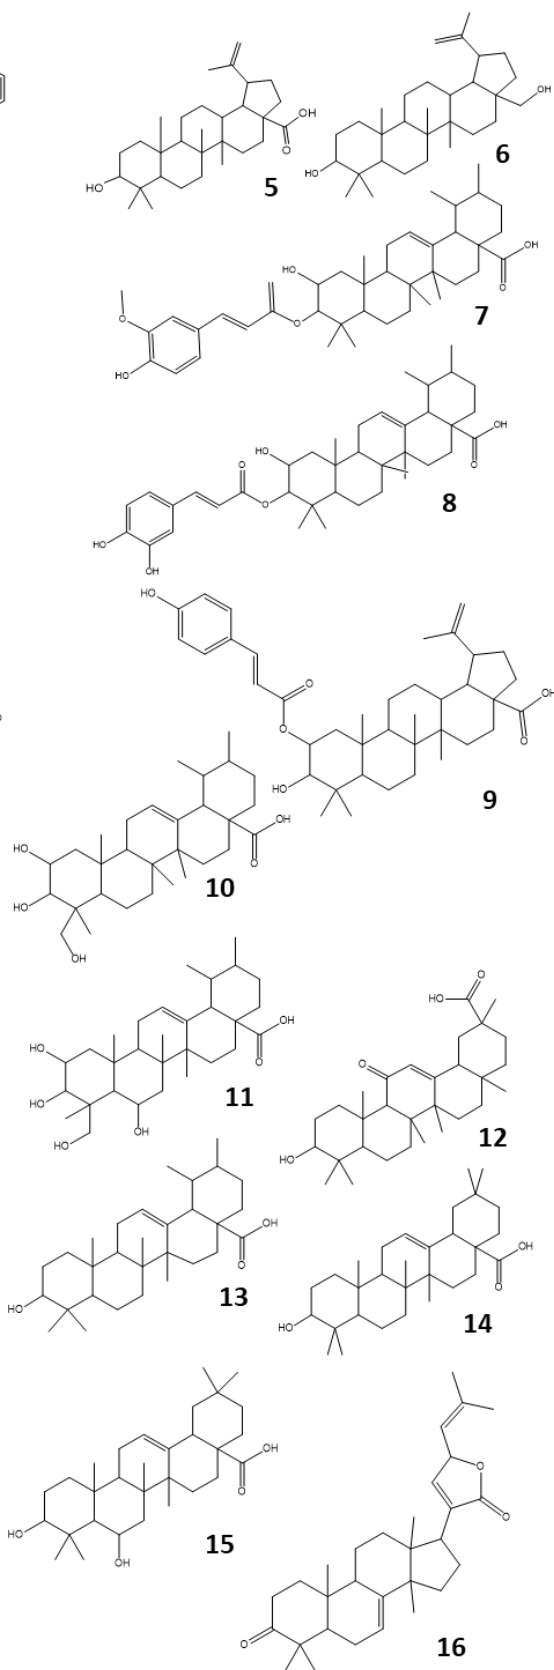

**Figure S2:** Synthesis of structures putatively identified for detected ions

# Supplementary Materials

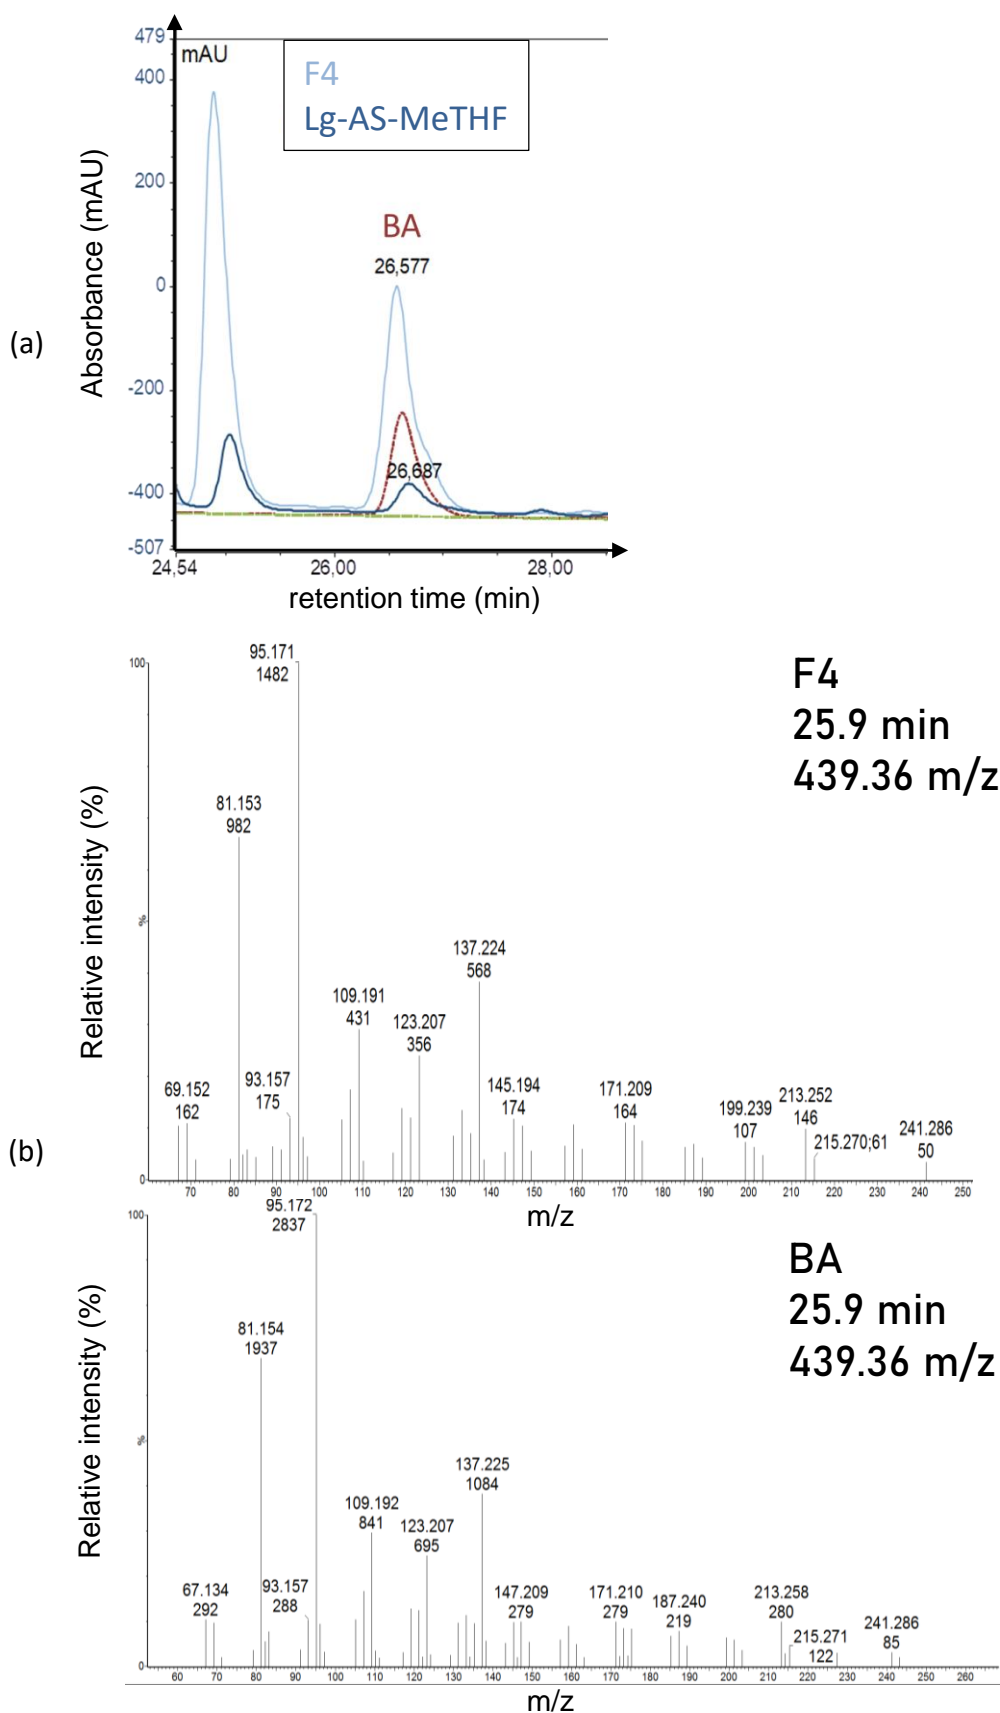

**Figure S3:** Identification of betulinic acid (BA) in Lg-AS-MeTHF extract and F4 fraction with comparison with standard: (a) HPLC-UV profil at 210 nm; (b) MS<sup>2</sup> spectra of MS targeted method (detection MS<sup>1</sup> at  $m/z$  439.36).

## Supplementary Materials

(a)

| Sample                                   | Peak area<br>(mAU*min) | Quantity per<br>mg ( $\mu\text{g}$ ) | Final concentration<br>per wells ( $\mu\text{g.mL}^{-1}$ ) | Biofilm<br>inhibition<br>(%) |
|------------------------------------------|------------------------|--------------------------------------|------------------------------------------------------------|------------------------------|
| F4<br>(1 mg.mL <sup>-1</sup> )           | 40.76                  | 169.31 $\pm$ 1.14                    | 8.5                                                        | 64                           |
| F5<br>(10 mg.mL <sup>-1</sup> )          | 115.80                 | 24.79 $\pm$ 1.38                     | 1.2                                                        | 50                           |
| Lg-AS-MeTHF<br>(10 mg.mL <sup>-1</sup> ) | 56.38                  | 23.73 $\pm$ 0.91                     | 1.5                                                        | 54                           |
| BA 6.25 $\mu\text{g.mL}^{-1}$            |                        |                                      | 6.25                                                       | 28                           |
| BA 25 $\mu\text{g/mL}^{-1}$              |                        |                                      | 25                                                         | 43                           |

(b)

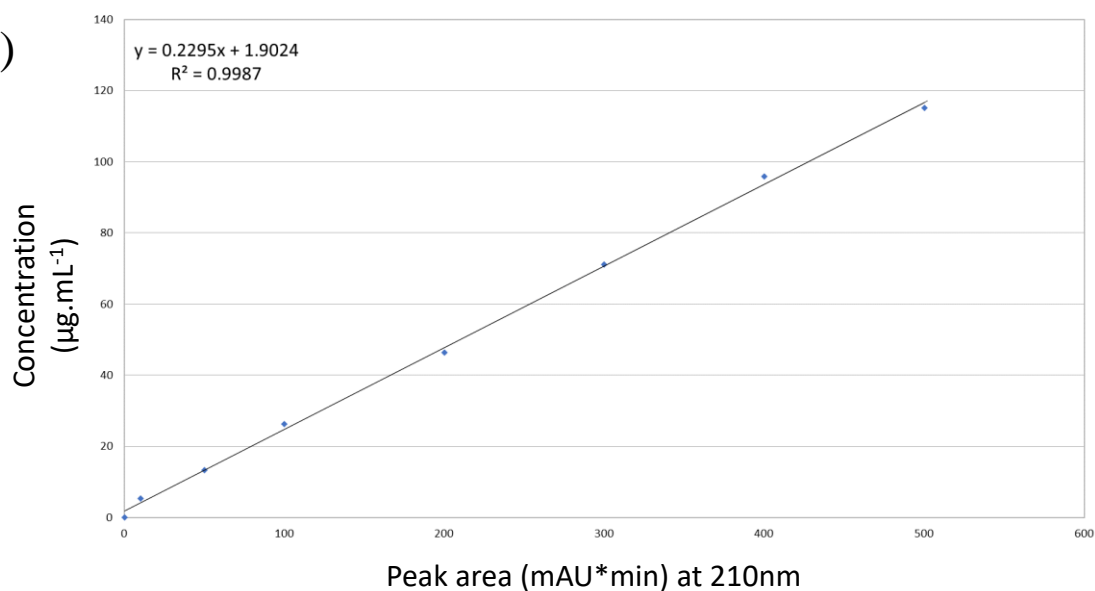

**Figure S4:** HPLC-UV dosage of betulinic acid (BA) from extract Lg-AS-MeTHF and active fractions F4 and F5 of *L. grandiflora*, compared to the relative bi-species biofilm inhibition: (a) quantification table of betulinic acid with quantity per mg, final concentration per wells and their respective biofilm inhibition activity; (b) standard range of betulinic acid curve area of absorbance at 210 nm in fonction of concentration. Standard calibration of BA by HPLC (210 nm)
